# Supplementary material
Source: Research Square preprint supplement (doi:10.21203/rs.3.rs-8980096/v1)
Supplement: Supplementary file 1 [file f1d501cc3615ecbbcb53c7ea.xlsx]

## Sheet: PKU database
ID	Sex (0=female, 1=male)	Age	Level of education*	DOB (m/d/y)	Date of the exam	MACE**	Mutation	Medication	Hypertension	DM***	Dyslipidaemia	Smoking	Body weight	Body height	BMI****	Muscle mass (kg)	Fat mass (kg)	Body fat percentage (%)	WHR*****	Phe	Glucose	Insulin	HOMA	CK	CK-MB	Troponin T	NT-proBNP	Total cholesterol	HDL cholesterol	LDL cholesterol	Lipoprotein (a)	Apolipoprotein A1	Apolipoprotein B	Triglycerides	Uric acid	Homocysteine	Vitamin D3	Vitamin B12	Folic acid	Ankle-brachial index	Carotis intima, right (cm)	Carotis intima, left (cm)
1	0	26.00	1	2/2/1997	10/24/2023	0		L-thyroxin 75/50 ug	0	0	0	0	41.9	158	16.8	16.9	9.9	23.5	0.76	450	05.04	14.73	3.3	27		3.6	43	4.5	1.49	2.69	2	1.26	0.8	0.8	221	9.6	47.2	551	44.75	1.18018018	0.035	0.03
2	1	23.00	3	3/22/2001	5/8/2024	0			0	0	0	1	59	183	17.6	29.6	5.9	10	0.79	805	4.29	4.44	0.84656	73		5.7	8	2.8	1.39	1.23	0.1	1.33	0.43	0.3	275	15.9	86.7	385	29.89	1.236641221	0.03	0.035
3	1	29.00	1	10/19/1993	8/16/2023	0			0	0	0	1	55.6	178	17.6	28-8	4.1	7.4	0.8	815	3.79	3.28	0.5524977778	121	8	6.8	51	2.4	1.13	1.23	0.1	01.02	0.37	0.5	306	36.2	65.7	322	13.15	1.25	0.035	0.04
4	1	31.00	2	7/17/1991	6/7/2023	0	R408W heterozygous	Calcium, vitamin D3 1000 IU	0	0	0	1	50	168	17.7	26.3	2.8	5.7	0.79	541	4.2	03.01	0.56	91	17	4.1	8	3.7	01.04	2.39	0.2	01.01	0.62	0.7	234	13.3	154	626	46.5	1.066666667	0.04	0.055
5	0	44.00	3	12/26/1978	1/11/2023	0			0	0	1	1	46.8	162	17.8	20.5	8.4708	18.1	0.81	475	4.97	4.29	0.9476133333	103	14	3	181	5.8	1.59	3.79	0.47	1.24	1	1.1	124	7.9	34.3	392	41.71	1.194915254	0.035	0.045
6	0	22.00	3	11/14/1999	10/12/2022	0	R158Q heterozygous		0	0	0	0	59.4	181	18.1	27.6	9.801	16.5	0.81	609	4.9	08.08	1.759644444	155	19	3	101	4.7	02.08	2.45	0.14	1.63	0.6	0.9	235	8	51.9	366	32.53	1.142857143	0.04	0.03
7	0	23.00	4	9/2/1999	7/5/2023	0			0	0	0	0	54.6	172	18.5	21.5	14.5	26.5	0.79	550	3.94	4.89	0.86	45		3	20	3.4	1.28	1.71	0.86	1.23	0.55	1	245	31.2	49.7
8	0	32.00	3	4/26/1991	6/7/2023	0	compound heterozygous: R408W and R158Q	Vitamin D3	0	0	0	0	53.4	166	19.4	22.1	13.1	24.6	0.82	604	4.46	3	0.59	60		3	21	4.7	2.16	2.13	0.1	1.81	0.79	0.9	209	15.9	133	188	12.12	1.131578947	0.04	0.04
9	0	21.00	4	6/23/2002	9/6/2023	0	R158Q+R408W heterozygous		0	0	0	0	49.5	160	19.4	21.3	10.6	21.5	0.82	478	4.98	11	2.43	51	19	3.1	17	3.7	02.04	1.51	0.11	1.39	0.46	0.6	246	13.9	97.2	489	30.27	1.219512195	0.04	0.15
10	0	36.00	4	5/14/1987	11/8/2023	0	R408W, R158Q heterozygous	Vitamin B6, vitamin D3 500 IU	0	0	0	0	45.5	153	19.4	18.6	10.8	23.7	0.8	397	5.2	14.11	3.26	71		5.9	71	4.1	1.4	2.48	0.1	1.29	0.74	1.1	119		156	475	108.72	1.227272727	0.04	0.05
11	0	22.00	4	6/23/2000	6/14/2023	0	R158Q+R408W heterozygous		1	0	0	0	53.7	165	19.7	20.5	15.7	29.2	0.81	440	4.67	3.94	0.82	47	14	5.1	29	3.6	1.37	1.87	0.28	1.27	0.53	1.1	149	10.5	88.5	567	48.14	1.231884058	0.05	0.04
12	1	22.00	4	4/19/2001	7/5/2023	0			0	0	0	0	63.1	178	19.9	28.8	11.2	17.7	0.82	659	4.59	4.78	0.97512	84		5	10	4.2	1.51	2.37	0.1	1.82	0.82	1.4	309	15	107	661	42.39	1.2	0.04	0.04
13	0	20.00	4	4/24/2002	9/14/2022	0			0	0	0	0	55.3	166	20.1	25.4	10.0646	18.2	0.81	765	4.9	9	1.97	78	14	3	81	2.8	1.31	1.62	0.1	1.11	0.47	0.11	127	6.5	48.8	497	42.5	1.026785714	0.03	0.03
14	1	43.00	2	7/21/1981	8/14/2024	0			0	0	0	1	60	172	20.2					1050	6.63	18.67	5.5			3	255	3.6	01.02	2.15	0.1	01.05	0.69	0.9	228	46.5	103	335	5.46		0.06	0.065
15	0	23.00	3	02/08/1999	09/21/2022	0			0	0	0	0	55.5	164	20.6	19.7	18.7035	33.7	0.82	380	4.43	7.58	1.492417778	70	45	3	29	3.7	1.58	1.99	0.1	1.27	0.57	0.8	210	33.1	30.5	169	17.16	1.142857143	0.035	0.04
16	0	36.00	4	5/18/1986	9/14/2022	0		Vitamin D3	0	0	0	0	54.8	162	20.9	21.5	15.344	28	0.85	243	04.09	4.57	0.8307244444	87	25	3	41	4.5	1.7	2.51	0.11	1.61	0.63	1.1	188	4.9	67.1	587	66.2	1.058823529	0.03	0.04
17	0	19.00	4	10/5/2002	9/21/2022	0		Vitamin D3, calcium	0	0	0	1	62.3	170	21.6	23.7	18.5654	29.8	0.83	664	3.4	16.9	2.553777778	68	17	3	40	4	1.64	02.08	0.1	1.26	0.58	0.8	150	5.4	42.3	424	48.25	1.263157895	0.04	0.025
18	0	37.00	3	10/30/1985	6/7/2023	0	R408W homozygous		0	0	0	0	54.6	159	21.6	20.1	17	31.1	0.83	777	4.52	2.88	0.58			5.2	80	5.4	1.89	3.3	0.76	1.57	0.87	0.7	138	22.4	57.7	242	19.56	1.157024793	0.03	0.05
19	1	38.00	4	11/18/1983	10/12/2022	0	R408W heterozygous	L-thyroxin 175 and 200 ug on a daily rotation	0	0	0	0	74.1	185	21.6	34.8	12.597	17	0.87	468	4.9	4.21	0.9168444444	199	23	3.3	57	3.6	0.88	1.79	0.11	0.93	0.71	1.1	251	8.1	72.4	594	46.18	1.109090909	0.04	0.04
20	0	45.00	3	9/7/1977	2/8/2023	0		calcium once daily, vitamin D3 3000 IU	0	0	0	0	58.5	164	21.8	24.3	14.2155	24.3	0.84	519	4.33	4.48	0.8621511111	283	15	3	50	4.3	1.63	2.42	0.19	1.4	0.57	0.6	149	7.2	42	815	42.35	1.251908397	0.035	0.055
21	0	41.00	3	5/12/1981	5/3/2023	0		Calcium	0	0	0	0	51.5	153	22.0	18.1	17.7	34.3	0.85	927	04.01	6.85	1.22	192	17	3	55	4.3	1.4	2.62	0.35	1.47	0.69	1.4	287	12.1	27.1	312	28.74	1.464285714	0.035	0.06
22	1	18.00	2	10/30/2004	7/19/2023	0	R243X heterozygous		0	0	0	0	69.3	176	22.4	35.3	7.4	10.6	0.85	616	4.74	6.54	1.38	148	27	14.7	10	4	1.45	2.34	0.73	1.21	0.72	0.9	295	12.8	85.5	499	39.97	1.216783217	0.04	0.04
23	1	19.00	2	1/11/2003	11/23/2022	0		Vitamin D3	0	0	0	0	53.9	155	22.5	25.4	8.3545	15.5	0.85	497	5.22	4.96	1.15072	68	14	3	6	5	1.14	3.3	0.8	01.02	0.55	1.7	195	7.5	32.3	353	36.58	1.3	0.035	0.04
24	1	30.00	1	2/3/1994	7/24/2024	0	R408W and R158Q heterozygous		0	0	0	1	62	166	22.5					449	6.6	20.56	06.03			3.9	10	4.8	1.18	2.85	0.1	1.32	0.71	2.5	260	16.1	88.2	311	35.69	0.8794326241	0.04	0.04
25	1	35.00	3	8/15/1988	8/23/2023	0	R408W heterozygous	Telmisartan 80 mg	1	0	0	0	68.4	174	22.6	32.6	10.4	15.3	0.87	460	4.46	7.72	1.53	100	24	6.6	13	4	1.16	2.49	0.27	01.06	0.66	0.9	251	20.2	134	329	58.03	1.41322314	0.04	0.03
26	0	19.00	4	7/2/2003	1/4/2023	0			0	0	0	0	61.2	164	22.7	22.2	19.8288	32.4	0.86	707	4.72	14.73	3.090026667	62	12	3	47	4	1.53	2.4	0.1	1.4	0.62	1.1	213	5.7	23.2	515	52.2	1.376146789	0.03	0.035
27	1	45.00	3	12/30/1978	5/8/2024	0	R408W heterozygous		0	0	0	0	77.7	185	22.7	33.6	17.6	22.7	0.86	1032	4.39	6.16	1.2	147		6.7	43	4.7	1.57	2.78	0.12	1.46	0.78	1.2	226	13.9	22.3	204	21.9	1.410447761	0.04	0.05
28	0	21.00	3	7/6/2001	9/7/2022	0			0	0	1	0	53	152	22.93975069					416	4.7	6.91	1.44	92	27	3	49	7.2	2.33	3.26	1.35	2.15	1.14	1.8	233	7.4	47.2	423	35.05	1.130434783	0.04	0.03
29	0	39.00	4	5/28/1984	8/23/2023	0			0	0	0	0	65.2	168	23.1	25.7	18.3	28	0.86	504	4.71	5.71	1.2	98	14	3	78	4.6	1.81	2.54	0.1	1.52	0.68	0.9	166	16.7	78	286	19	1.221238938	0.04	0.04
30	1	47.00	4	1/1/1977	3/20/24	0		Calcium, vitamin D3	0	0	0	0	75.4	180	23.3	34.2	15	19.9	0.9	315	4.53	14.17	2.852893333	124		5.8	14	4.3	1.6	2.34	0.1	1.37	0.58	1	191	9.3	135	555	65.25	1.266666667	0.05	0.045
31	0	45.00	4	8/28/1978	5/8/2024	0			0	0	0	0	60.3	160	23.6	25	15	24.9		353	4.56	7.32	1.52			4.2	66	4.3	2.24	1.67	0.16	1.94	0.57	0.9	253	18	82	350	29.13	1.31092437	0.035	0.05
32	1	30.00	3	7/3/1992	12/14/2022	0			0	0	0	0	70.1	172	23.7	28.5	19.2775	27.5	0.91	582	6	25.14	6.704	146	12	3.6	12	4.8	1.27	3.36	0.1	1.1	0.84	1	210	7.5	42.6	403	53.16	1.171875	0.04	0.05
33	1	46.00	2	9/28/1977	5/22/2024	0		Acitretin, betamethason/salicylic acid 0.64 mg/20 mg, calcium carbonicum, vitamin D3 1000 IU	0	1	1	1	77.6	180	24.0	37.8	10.8	13.9	0.89	1101	5.91	18.28	4.8			4.9	12	5.9	1.21	4.12	0.85	1.25	1.25	1.4	322	19.9	49.5	266	19.89	1.220588235	0.085	0.06
34	1	38.00	1	5/18/1986	8/14/2024			Occasionally diclofenac, tolperisone,aceclofenac, dexketoprofen	0	0	0	1	78.4	180	24.2					1105	4.6	4.84	0.99			12.6	98	3.2	1.2	1.62	0.1	1.24	0.52	0.8	353	19.1	90.2	238	25.59		0.035	0.045
35	1	18.00	3	11/20/2003	10/19/2022	0		Vitamin D3 3000 IU	0	0	0	1	70.4	170	24.4	31.4	14.784	21	0.86	586	5.8	57.42	14.8016	113	16	3	24	5.1	01.06	2.7	0.1	01.06	0.83	2	307	10.8	42.9	404	29.16	1.171428571	0.035	0.045
36	1	23.00	4	1/9/2001	6/19/2024	0			0	0	0	0	82.6	184	24.4	38.4	14.9	18	0.88	635	4.92	7.31	1.5	127		4.2	16	4.5	1.26	2.68		1.33		0.7	272		124			1.491803279	0.035	0.025
37	1	45.00	3	12/24/1978	3/6/2024	0	R158Q and R 408 W heterozygous	Calcium, vitamin D3, fenofibrate	1	0	1	0	69.4	169	24.6	27.2	20.2	29.1	0.9	438	5.85	7	1.82			4.9	17	6.5	1.35	4.53	0.17	1.33	1.25	2.4	241		67.2			1.363057325	0.03	0.045
38	1	32.00	2	8/28/1992	3/13/2024	0	R408W heterozygous	Vitamin D3, magnesium	0	0	0		73.4	173	24.8	33.8	14.5	19.8	0.9	819	4.38	3.87	0.75336			4.7	5	3.8	1.11	2.28	0.1	1.25	0.66	1.3	340	16.2	84.2	233	28.01	1.269230769	0.04	0.05
39	1	25.00	3	11/10/1998	11/15/2023	0			0	0	0	1	78.4	178	24.8	32.4	21.1	26.9	0.93	450	4.77	12.6	2.68	101	19	4	8	4.2	1.5	2.42	0.1	1.83	0.64	1.2	267	14.5	171	721	70.34	1.181818182	0.035	0.035
40	0	38.00	3	12/21/1984	6/14/2023	0		Salazopyrin 2x500 mg, folic acid 2x3 mg, magnesium	0	0	1	1	63.4	160	24.8	22.7	21.6	34.1	0.88	552	5.89	08.05	2.11	107		5	73	5.1	1	3.54	0.11	0.93	0.94	1.4	168	8.8	168	740	108.72	1.057377049	0.025	0.04
41	1	18.00	1	7/17/2005	7/19/2023	0			0	0	0	0	74.6	173	24.9	36.6	10.5	14	0.9	707	4.79	10.79	2.3	266	14	10	42	2.6	0.83	1.47	0.22	0.93	0.51	1.6	366	12.9	88.5	357	46.82	1.215517241	0.04	0.06
42	0	47.00	3	12/11/1975	7/19/2023	0		Vitamin D3 3000 IU, occasionally fenofibrate	0	0	1	0	61.5	157	24.9	23.3	19.5	31.8	0.88	638	4.95	11.9	2.62	148	13	5.4	103	4.1	1.26	2.51	0.42	1.27	0.73	1.8	293	14.1	77	290	36.71	1.282051282	0.04	0.04
43	0	36.00	4	5/6/1988	6/19/2024	0	R158Q heterozygous	Vitamin D3, magnesium, vitamin C 500 mg, folic acid 3 mg, lutein, curcuma, garlic extract	0	0	0	0	71.3	167	25.6	26.3	23.3	32.6	0.89	460	05.01	9.21	02.05	106		6.3	37	4.9	1.76	2.72	0.1	1.59	0.99	0.9	251	14.8	96.2	274	55.3	1.368	0.035	0.04
44	0	43.00	3	4/2/1980	5/4/2023	0		Vitamin D3 1x2000 IU, 2 tabs of tamoxifen 10 mg, omega-3, goserelin depot injection once a month	0	0	1	0	70.2	165	25.8	24.5	22	31.3	0.87	216	06.06	39.99	10.77	100	11	4.9	43	3.4	1.36	1.7	0.1	1.53	0.55	1.8	204	10.3	30.5	444	48.94
45	0	30.00	3	8/30/1992	9/7/2022	0			0	0	0	1	67	161	25.8					450	3.9	10.07	1.745466667	76	19	3	29	5.1	1.92	2.81	0.86	1.69	0.76	0.9	237	16.9	32.9	567	15.3	1.142857143
46	0	38.00	3	3/25/1985	10/11/2023	0	R408W heterozygous	Levonorgestrel/ethyloestradiol, vitamin C	0	0	0	0	63.8	157	25.9	23.3	21.3	33.4	0.91	758	4.98	6.59	1.46	141	17	3	111	3.9	1.57	2.2	0.1			1	207	10.5	109	250	89.09	1.245614035	0.045	0.03
47	1	28.00	4	4/18/1995	4/25/2023	0		Vitamin D3 1000 IU, calcium 500 mg	0	0	1	0	84.3	180	26.0	42.7	10.4	12.3	0.9	580	4.8	6.94	1.48	192		7.6	16	5.5	1.47	3.64	0.15	1.32	01.05	1.2	246	12.9	76.4	521	53	1.17	0.04	0.045
48	1	36.00	2	11/25/1986	2/15/2023	0			0	0	1	0	73.6	168	26.1	34.8	13.1008	17.8	0.92	758	4.62	8.23	1.689893333	124	13	4.7	16	4.4	0.81	2.45	0.11	01.01	0.78	4.9	296	8.8	29.4	643	51.31	1.119047619	0.045	0.045
49	0	46.00	3	1/7/1977	8/16/2023	0	compound heterozygous: R408W and R261Q	tizanidine 2 mg	0	0	0	1	66.8	159	26.1	24.1	22.7	34	0.89	479	5.35	26.73	6.36		29	4.2	32	5.1	01.01	3.44	2.21	01.05	01.06	2.5	120	7.8	112	383	65.66	1.368421053	0.05
50	0	47.00	3	8/6/1975	3/1/2023	0		Diosmin/hesperidin occasionally, calcium, vitamin D3 3000 IU	0	0	0	0	72.3	164	26.2	25.7	25.1	34.7	0.9	687	5.15	4.88	1.116977778	91	14	4.9	23	5.5	1.96	3.51	0.1	1.59	2.72	0.9	262	13.9	33.8	281	42.17	1.2	0.055	0.035
51	1	32.00	3	03/23/1990	10/05/2022	0		Perindopril 5 mg	1	0	0	0	83.7	178	26.4	37.8	17.6607	21.1	0.94	459	4.6	17.84	3.647288889	139	19	3	10	4.5	0.87	2.2	0.63	0.87	0.84	1.9	238	7.4	55.5	625	50.99	1	0.044	0.04
52	0	39.00	2	5/15/1983	4/5/2023	0		Bisoprolol 5 mg, 0.5 tablet daily	0	0	0	1	75.4	169	26.4	41.6	31.3664	41.6	0.9	376	4.5	17.5	3.5	59	15	4.9	217	4.1	2.27	1.63	0.1	1.66	0.48	1.1	338	15	30.9	348	72.9	1.2	0.04	0.045
53	1	45.00	1	6/6/1978	9/6/2023	0	compound heterozygous: R408W and IVS10nt546	Fenofibrate 267 mg, silymarin 140 mg,	0	0	1	0	71.1	163	26.8	29.3	19.4	27.3	0.93	399	4.59	25	5.16	88	22	6.3	55	5.6	0.93	3.83	0.91	0.98	1.13	2.7	333	20.7	65.7	468	36.47	1.12	0.04	0.035
54	1	43.00	1	8/27/1980	3/6/2024	0			0	0	0	1	75.6	168	27.4	28	25.6	33.8	0.95	600	5.21	8.55	5.21			4.9	5	3.4	0.95	1.6	0.1	1.29	0.54	3.8	383		53.2			1.504347826	0.035	0.03
55	1	45.00	4	4/27/1978	9/13/2023	0	R408W heterozygous	Vitamin D3	0	0	0	0	82.9	174	27.4	33.5	23.1	27.9	0.92	632	4.87	09.02	1.95	4017		5.6	64	4.6	1.22	2.99	0.12	1.14	0.8	1.9	196	11.9	82.5	494	71.63		0.05	0.04
56	0	32.00	4	10/28/1989	9/7/2022	0		Vitamin D3	0	0	0	1	68.5	158.1	27.5	25.7	32.743	47.8	01.01	597	4.5	2.31	0.462	81	145	13	126	4.1	1.27	02.02	0.13	1.39	0.56	2.2	245	7.8	28.5	824	16.64	1.4	0.03	0.04
57	1	24.00	3	2/13/1998	12/14/2022	0			0	0	1	0	75.1	165	27.6	30.3	21.5537	28.7	0.92	557	5.1	18.97	4.299866667	352	11	3	15	5.5	0.95	3.95	0.14	01.01	01.06	2.2	274	5.9	31.7	576	42.76	1.097014925	0.035	0.035
58	0	29.00	3	9/8/1993	11/09/2022	0			0	0	0	1	77.9	167.7	27.7	25	32.2506	41.4	01.07	816	4.6	15.28	3.123911111	73	21	3	42	5.1	1.58	2.4	0.1	1.15	0.74	0.8	255	14.3	25	229	9	1.281818182	0.04	0.04
59	1	39.00	2	9/16/1982	9/14/2022	0			0	0	0	0	75.8	165	27.8	34.2	15.9938	21.1	0.93	1001	5.5	9.83	2.402888889	172	22	5.6	13	4.8	01.08	2.74	0.1	1.14	0.76	0.3	408	17.2	34.1	352	16.1	1.153846154	0.045	0.04
61	1	45.00	4	11/27/1977	8/16/2023	0	R408W homozygous	Nebivolol 2,5 mg, fenofibrate 160 mg	1	0	1	1	74.7	164	27.8	28.5	23.4	31.3	0.94	620	4.19	8.9	1.66	160	13	7.2	12	4.2	0.9	2.87	0.1	0.99	0.74	2.3	164	15	85.2	446	77.39	1.440677966	0.085	0.065
60	1	34.00	3	7/24/1989	10/18/2023	0	R408 W heterozygous		0	0	0	0	95.3	185	27.8	42.2	21.1	22.2	0.92	570	4.74	6.96	1.47	321	23	9.5	24	4.4	01.04	2.84	0.66	01.03	0.8	1.1	366	13.6	118	404	49.85	1.387596899	0.045	0.035
62	1	47.00	2	2/13/1977	3/20/2024	0			0	0	1	1	86.4	176	27.9	34.2	25.9	30	0.97	565	4.88	09.03	2.38			3.2	15	5	01.02	2.99	0.1	1.24	0.96	3.3	264	14.2	37.5	199	27.59	1.424242424	0.07	0.06
63	0	40.00	3	6/29/1983	12/6/2023	0			0	0	0	0	85.8	175	28.0	30.1	31.9	37.1	0.93	815	5.22	10.07	2.33624	136	21	3.5	64	4.7	1.24	3.13	0.52	1.32	0.79	1.4	311	23.1	39.2	201	15.18	1.260162602	0.04	0.075
64	1	27.00	2	3/3/1996	9/13/2023	0			0	0	0	1	83	172	28.0	36.2	19.6	23.6	0.98	1119	4.55	14.63	2.96			5.5	10	4	0.86	2.61	0.1	0.93	0.73	2.3	461	14.9	72.2	189	16.16	1.131147541	0.04	0.04
65	0	47.00	3	5/7/1976	8/16/2023	0			0	0	0	0	76.5	165	28.1	26.2	28.9	37.8	0.95	647	4.9	27.4	6	146	17	6.8	54	4.9	1.35	2.94	0.1	1.22	0.76	1.7	176	14.5	80.7	389	49.83	1.391304348	0.06	0.06
66	0	22.00	3	10/21/2000	7/12/2023	0			0	0	0	0	79.7	168	28.2	28.2	28.8	36.1	0.9	889	4.45	7.73	1.53	141	22	4	127	4	1.64	02.06	0.16	1.3	0.58	0.6	202	27.1	57.7	226	18.25	1.068965517	0.04	0.04
67	1	43.00	4	6/16/1979	10/19/2022	0		Vitamin D3	0	0	0	0	91.9	178	29.0	38.9	22.7912	24.8	0.96	320	4.7	8.25	1.723333333	149	19	4.5	65	4.6	0.94	2.19	0.19	0.87	0.86	0.8	235	6.7	53.9	749	29.11	1.018867925	0.065	0.04
68	0	48.00	1	04/16/1974	2/1/2023	0		Ramipril 2.5 mg, rosuvastatin 10 mg	1	0	1	0	64.5	149.2	29.0	24.6	20.5	31.7	0.84	1119	5	22.57	5.015555556	220	25	7.5	64	5.1	1.38	3.64	0.1	1.27	0.91	1.2	225	10.3	22.8	314	18.73	1.298136646	0.07	0.07
69	1	21.00	3	4/29/2001	11/23/2022	0			0	0	0	1	88.1	174	29.1	35.3	25.4609	28.9	0.94	514	5.1	10.01	2.268933333	260	17	4.5	23	3.2	1.12	1.73	0.1	1.14	0.99	1	338	9.8	32.3	357	40.3	1.37	0.04	0.04
70	1	42.00	3	07/18/1980	10/12/2022	0		Calcium 500 mg, C-vitamin, Jutavit	0	0	0	0	84.4	170	29.2	30.8	29.2024	34.6	0.99	599	4.6	9.56	1.954	115	13	3	16	2.9	0.94	1.71	0.1	0.92	0.48	0.9	235	9.7	49.3	383	42.87	1.230769231	0.045	0.04
71	1	24.00	3	7/17/1999	11/15/2023	0			0	0	1	0	100.4	185	29.3	42.9	24.6	24.5	0.95	421	4.28	7.9	1.5	170	18	7.2	5	5.1	1.43	3.51	0.31	1.28	0.89	0.6	422	19.5	47.2	289	18	1.4	0.04	0.35
72	1	49.00	1	9/7/1973	3/1/2023	0		Risperidon 2x1.5 mg, rivotril 3x0.5 mg, quetiapin 2x300 mg, vitamin C, vitamin D3, calcium	0	0	0	0	80	165	29.4					962	5.37	6.24	1.48928	127	29	5	17	4.8	1.27	3.37	0.22	1.2	0.87	0.6	215	11.1	30.9	439	17.79	1.311111111	0.04	0.04
73	1	38.00	3	7/2/1985	2/7/2024	0		Vitamin D3 3000 IU	0	0	0	0	95.5	180	29.5	39.3	25.9	27.1	0.96	784	4.5	12.3	2.46	159	16	10.2	5	4.6	1.18	3.29	01.07	1.12	0.86	0.9	348	61.4	96.2	215	17.22	1.119266055	0.035	0.035
74	1	33.00	3	3/4/1989	2/15/2023	0			0	0	0	0	96	180	29.6	41.8	23.136	24.1	0.92	830	4.84	14.66	3.153528889	168	14	3.3	11	4.6	01.06	03.01	0.1	1.11	0.76	2.8	351	14.3	25.2	351	38.73	1.394736842	0.065	0.06
75	0	36.00	3	6/13/1986	9/21/2022	0			1	0	1		77.7	162	29.6	28.4	27.7389	35.7	0.95	549	4.6	17.42	3.561422222	88	14	3	22	6.4	2.16	2.84	0.1	1.77	01.01	2	248	7	40.8	570	27.03	1.153846154	0.05	0.05
76	1	39.00	4	7/10/1983	11/09/2022	0		Fenofibrate, vitamin D3 3000 IU, ramipril 2x2.5 mg, indaoamide SR 1.5 mg	1	0	1	0	111.8	194	29.7	45.9	30.745	27.5	0.97	457	5	31.81	7.068888889	114	12	3.5	29	5.5	01.01	2.41	0.1	0.93	0.96	2.8	371	11.7	29.5	457	62.81	1.319148936	0.045	0.055
77	1	25.00	3	2/26/1998	9/20/2023	0		Calcium, vitamin D3	0	0	0	0	92	175	30.04081633					770	4.48	15.3	03.05	102		6.6	47	3.3	0.93	2.29	0.1	0.96	0.6	0.7	365		104	375	42.16	1.491525424	0.04	0.45
78	0	45.00	4	4/7/1978	1/24/2024	0		carvedilol 6.25 mg, clopidogrel 75 mg, rosuvastatin/ezetimibe 20 mg/10 mg	1	0	1	0	79	162	30.1	24.5	34.2	43.3	0.95	472	4.22	8.7	1.63	48	15	4.1	111	3.4	1.42	1.83	0.85	1.34	0.64	1.1	274	22	89.5	319	17.33	1.357798165	0.04	0.55
79	1	22.00	3	2/24/2002	5/22/2024	0			0	0	1	1	106.1	187	30.3	47.7	23.5	22.2	0.95	717	4.27	13.09	2.48			16.2	5	5.8	3.8	1.45	0.1	1.5	0.99	1.6	382	22.7	38.5	289	28.96	1.312056738	0.035	0.045
80	1	45.00	4	10/3/1977	7/5/2023	0			1	0	1	0	96	178	30.3	36.9	30.9	32.2	0.94	929	07.02	46.64	14.55	270		9.2	69	5.2	1.32	3.47	0.1	1.3	01.09	1.6	293	25.3	55	277	13.2	1.39	0.05	0.06
81	0	20.00	4	8/20/2002	11/02/2022	0			0	0	0	1	88.8	171	30.4	25.1	42.5352	47.9	0.97	771	4.3	24.41	4.665022222	81	14	3	26	5.6	1.49	2.62	1.38	1.24	0.94	1.7	295		22.4	374	21.97	1.173913043	0.04	0.035
82	1	45.00	4	4/9/1978	2/7/2024	0			0	0	0	0	95.5	175	30.5	37.6	29	30.4	0.96	427	4.65	10.7	2.23	87	36	4.5	6	4.8	1.42	03.07	0.15	1.24	0.78	0.9	272	13.1	86.7	472	48.03	1.24	0.055	0.065
83	1	31.00	4	1/31/1992	8/2/2023	0			0	0	0	0	91.6	173	30.6	36.8	26.2	28.6	0.96	467	4.26	7.84	1.48	76	17	4.3	64	4.3	1.64	2.51	0.85	1.28	0.75	1.3	238	18.4	102	295	20.79	1.038167939	0.035	0.03
84	0	34.00	4	1/20/1989	4/5/2023	0		Vitamin D3 2000 IU, calcium 500 mg daily, multivitamin complex	0	0	1	0	80.7	162	30.7	43.4	34.701	43	0.95	313	4.8	11	2.22	66	12	3.7	77	3.4	01.01	1.94				2	232	9.1	24.6	263	35.2	1.16	0.04	0.045
85	1	23.00	3	5/1/2000	1/10/2024	0	R408W		0	0	0	0	93.9	175	30.7	42.3	20.5	21.9	0.99	754	4.68	11.34	2.36	180	28	4.1	5	3.9	0.86	2.47	0.1	0.99	0.63	1.1	470	13.4	71.2	308	35		0.05	0.045
86	0	44.00	2	7/6/1978	5/24/2023	0	R408W heterozygous	Metoprolol 50 mg, cetirizine, aspirin 100 mg, amlodipin 5 mg	1	0	1	0	74.7	156	30.7	24.8	29.5	39.5	0.94	977	4.89	13.64	2.96	70	14	4.4	144	4.8	1.26	3.43	0.1	1.31	0.8	1.3	308	16.1	66.5	272	17.47	1.3125	0.06	0.06
87	0	46.00	2	10/22/1977	3/13/2024	0	R408W heterozygous	Tizanidine MR 6 mg, tolperisone 2x1, metamizole	1	0	0	0	80.1	162	30.9	26.4	31.6	39.5	0.95	1211	4.81	9.53	02.04	66		4.3	41	4.3	1.18	2.76	0.1	1.21	0.75	1.2	205	15.8	47.7	373	16.44	1.292307692	0.05	0.045
88	0	26.00	2	6/1/1997	7/19/2023	0		Calcium, vitamin D3	0	0	1	1	84.9	165	31.2	26.1	37.3	43.9	0.97	628	4.66	13.45	2.79	65	21	3	64	4.9	1.13	3.35	0.75	1.1	0.95	1.6	301	8.1	100	469	52.2	1.28	0.035	0.03
89	0	42.00	3	4/19/1980	4/12/2023	0		Calcium, vitamin D3	0	0	1	0	91.2	168	32.3	30.1	37.3008	40.9	0.98	588	6	25	6.57	294	20	3	18	5.8	1.63	3.7	0.16	1.45	0.96	0.8	222	12.9	28	429	46	1.28	0.065	0.055
90	0	30.00	4	10/7/1993	10/11/2023	0		Vitamin D3	1	0	0	0	78.7	156	32.3	25.6	32.2	41	1	580	5.32	11.98	2.83	66	22	3	26	4.4	1.69	2.41	0.1	1.22	0.7	0.6	216	10.6	124	579	71.48	1.339285714	0.04	0.03
91	0	28.00	3	9/15/1995	7/10/2024	0	R408W heterozygous		1	0	1	0	79.3	155	33.0	23.1	37.1	46.8	0.95	655	4.28	21.05	4	116		3	42	6.8	02.02	4.19	0.1	1.83	0.94	0.9	278	18.5	100	192	31.62	1.34057971	0.035	0.04
92	0	37.00	4	7/3/1985	11/09/2022	0		Metformin XR 2x750 mg, folic acid 2x5 mg, vitamin D3 2x3000 IU, methyldopa 2x250 mg	1	1	0	0	89.8	163	33.8	25.6	42.8346	47.7	1	374	4.8	30.33	6.4704	54	17	3	56	6.4	1.12	2.81	0.1	1.1	1.14	2.7	363	8.7	61.4	588	108.72	1.384	0.04	0.06
93	1	38.00	2	8/10/1984	5/24/2023	0	R408W heterozygous	Perindopril/amlodipin 5 mg/5 mg 2x1	1	1	1	0	101.6	173	33.9	39	33.5	32.9	0.96	1332	5.27	25.09	5.88	802	34	13.9	18	5.6	1.84	3.77	0.53	1.45	0.81	0.8	299	13.7	43	325	38.48	1.620689655	0.07	0.07
94	1	41.00	2	7/17/1981	2/8/2023	0		Rosuvastatin 20 mg, aspirin 100 mg, fenofibrate 140 mg, bisoprolol/perindopril 5/5 mg, vitamin D3 2000 IU	1	0	1	0	99.5	171	34.0	41.3	28.457	28.6	0.99	831	4.8	11.51	2.455466667	258	22	6.6	25	2.4	0.81	1.36	0.1	0.98	0.43	1	246	14.3	28.4	238	29.4	1.335820896	0.045	0.055
95	0	47.00	2	5/2/1976	11/8/2023	0	R408 W heterozygous		0	0	1	0	89.4	162	34.0	27.5	39.8	44.6	1	762	5.51	15.82	3.87	130		3.4	-	5	1.31	3.53	0.44	1.23	0.92	1	308	-	62.5	512	63.63	1.323076923	0.08	0.07
96	1	32.00	2	9/20/1990	9/13/2023	0			0	0	0	0	98.8	165	36.3	32.3	41.6	42.2	01.04	1057	4.55	13.61	2.75	123		4	5	4.6	01.08	3.25	0.1	01.05	0.83	1.4	477	14.4	83.5	187	16.79	1.051851852	0.025	0.05
97	0	42.00	3	8/19/1980	5/3/2023	0			0	0	1	0	92.8	160	36.3	28.7	41.1	44.2	1	193	4.61	10.15	02.08	99	9	6.4	101	5.9	1.41	4.2	0.1	1.43	0.96	1.9	250	8.9	33.2	382	44.26	1.426573427	0.05	0.055
98	1	21.00	4	8/5/2002	8/16/2023	0			0	0	0	0	115.1	178	36.3	38.5	46.4	40.5	0.99	989	4.82	23.62	05.06	103	20	9.3	14	4.2	0.88	2.49	0.1	01.04	0.71	3	372	69.2	56.5	295	12.39	0.953125	0.04	0.05
99	0	49.00	4	7/6/1974	11/15/2023	0		Ramipril 5 mg, vitamin D3 3000 IU, calcium	1	0	0	0	97	162	36.96					629	4.6	11.56	2.37	88	20	4.2	21	4.7	1.51	2.87	0.1	1.37	0.72	1.1	405		81.5	269	27.81	1.526315789	0.04	0.04
100	0	47.00	1	09/02/1975	09/21/2022	0		Rivotril 2x0.5 mg, venlafaxine 75-0-150 mg, pantoprazole 2x40 mg, verapamil 1x120 mg, zolpidem occasionally, oxybutynin 2x5 mg, tolperisone 2x150 mg, beclometasone dipropionate/formoterol 2x2 inhalations, montelucast 10 mg, bilastin 20 mg, vitamin B1/vitamin B6 100 mg/100 mg, medroxyprogesteron inj. every 12 weeks s.c.	1	1	1	0	110.5	165	40.6	29.4	56.4655	51.1	01.06	791	4.1	24.99	4.553733333	114	21	10.4	60	4.2	2.11	02.08	0.16	01.09	0.81	1.2	353	13.9	37.7	229	8.75	1.193548387	0.05	0.065
101	0	27.00	4	09/23/1995	10/05/2022	0	R408W heterozygous	Nebivolol 12.5 mg, perindopril 2.5 mg, metformin 2x1000 mg	1	1	0	1	118.5	168	42.0	34.7	56.88	48	01.01	537	5.5	86.94	21.252	168	21	7	22	4.7	1.2	2.67	0.1	1.1	0.8	0.9	278	7.1	49.1	426	53.46	1.214285714	0.04	0.04
102	0	46.00	3	8/2/1977	4/24/2024	0		Metformin XR 2x1000 mg, vitamin D3, perindopril 2 mg	1	1	0	0	122.2	167	43.8	32.7	63.1	51.6	01.01	1079	4.48	25.28	05.03			3.9	11	5.6	2.14	3.14	0.61	1.87	0.84	1.6	248	17.4	85.5	231	19.73	1.240601504	0.075	0.08
103	0	32.00	2	6/15/1990	2/8/2023	0		Vitamin D3	0	0	0	0	116	155	48.3	29	64.264	55.4	01.09	1042	4.51	22.62	4.534053333	86	10	3	40	4.5	1.29	3	0.21	1.31	0.74	1	300	6.6	30	299	21.95	1.265625	0.045	0.05
104	0	31.00	3	10/18/1991	10/11/2023	0		L-thyroxin 125 ug, bisoprolol 5 mg, inositol, iron	1	1	0	0	144	156	59.2	36	78.9	54.8	0.96	1006	6.37	177.4	50.22391111	245		13.7	76	2.7	0.69	1.47	0.3	0.83	0.5	1.1	288	9.1	6.5				0.045	0.035
* 1: elementary (8 grades),2: trade school, 3: high school diploma 4: university
** Major Adverse Cardiovascular Event
*** Diabetes Mellitus
****Body Mass Index
***** Waist-hip ratio

## Sheet: PKU.control database
ID	Sex (0=female, 1=male)	Level of education*	Control ID	Age (PKU)	Age (control)	Smoking (PKU	Smoking (control)	MACE** (PKU)	MACE (control)	Hypertonia (PKU)	Hypertonia (control)	DM***(PKU)	DM (control)	t.cholesterol (PKU)	t.cholesterol (control)	HDL (PKU)	HDL (control)	triglycerides (PKU)	triglycerides (control)	LDL (PKU)	LDL (control)	uric acid (PKU)	urid acid (control)	BMI**** (PKU)	BMI (control)
1	0	1	6028956	26	30	0	1	0	0	0	0	0	0	4.5	5	1.49	1	0.8	2	2.69	3.6	221	243	16.8	25.71
2	1	3	6163602	23	24	1	1	0	0	0	0	0	0	2.8	4	1.39	1	0.3	3	1.23	2.4	275	255	17.6	25.40
3	1	1	6058036	29	29	1	0	0	0	0	0	0	0	2.4	5	1.13	2	0.5	1	1.23	2.8	306	281	17.6	25.47
4	1	2	6005478	31	31	1	1	0	0	0	0	0	0	3.7	4	01.04	1	0.7	1	2.39	3.8	234	264	17.7	28.73
5	0	3	6165691	44	44	1	0	0	0	0	0	0	0	5.8	5	1.59	2	1.1	1	3.79	2.8	124	175	17.8	19.57
6	0	3	6115641	22	21	0	1	0	0	0	0	0	0	4.7	4	02.08	1	0.9	1	2.45	2.8	235	178	18.1	29.39
7	0	4	6128371	23	23	0	0	0	0	0	0	0	0	3.4	6	1.28	2	1	1	1.71	3.8	245	304	18.5	18.94
8	0	3	6039730	32	33	0	1	0	0	0	0	0	0	4.7	6	2.16	1	0.9	1	2.13	4.8	209	189	19.4	25.86
9	0	4	6005751	21	19	0	0	0	0	0	0	0	0	3.7	6	02.04	2	0.6	1	1.51	3.8	246	160	19.4	17.91
10	0	4	6055419	36	36	0	0	0	0	0	0	0	0	4.1	6	1.4	2	1.1	1	2.48	3.8	119	160	19.4	17.56
11	0	4	6141327	22	19	0	0	0	0	1	0	0	0	3.6	5	1.37	2	1.1	1	1.87	2.8	149	228	19.7	19.88
12	1	4	6020802	22	24	0	0	0	0	0	0	0	0	4.2	4	1.51	1	1.4	1	2.37	2.8	309	283	19.9	19.62
13	0	4	6107934	20	21	0	0	0	0	0	0	0	0	2.8	4	1.31	1	0.11	1	1.62	2.8	127	284	20.1	19.20
14	1	2	6105334	43	43	1	1	0	0	0	0	0	0	3.6	7	01.02	1	0.9	1	2.15	5.8	228	325	20.2	30.76
15	0	3	6068051	23	22	0	0	0	0	0	0	0	0	3.7	5	1.58	2	0.8	1	1.99	2.8	210	165	20.6	19.61
16	0	4	6062923	36	36	0	0	0	0	0	0	0	0	4.5	4	1.7	1	1.1	1	2.51	2.8	188	167	20.9	19.88
17	0	4	6124001	19	20	1	1	0	0	0	0	0	0	4	7	1.64	2	0.8	1	02.08	4.8	150	178	21.6	23.12
18	0	3	6019550	37	36	0	0	0	0	0	0	0	0	5.4	5	1.89	2	0.7	1	3.3	2.8	138	192	21.6	22.23
19	1	4	6002374	38	36	0	0	0	0	0	0	0	0	3.6	6	0.88	1	1.1	1	1.79	4.8	251	340	21.6	28.41
20	0	3	6057903	45	43	0	0	0	0	0	0	0	0	4.3	7	1.63	1	0.6	2	2.42	5.6	149	282	21.8	24.84
21	0	3	6057903	41	43	0	0	0	0	0	0	0	0	4.3	7	1.4	1	1.4	2	2.62	5.6	287	282	22.0	24.84
22	1	2	6152891	18	16	0	0	0	0	0	0	0	0	4	3	1.45	1	0.9	1	2.34	1.8	295	308	22.4	24.82
23	1	2	6096647	19	17	0	0	0	0	0	0	0	0	5	3	1.14	1	1.7	1	3.3	1.8	195	308	22.5	18.21
24	1	1	6012052	30	28	1	1	0	0	0	0	0	0	4.8	5	1.18	1	2.5	8	2.85	2.4	260	388	22.5	35.08
25	1	3	6045166	35	33	0	1	0	0	1	0	0	0	4	5	1.16	1	0.9	1	2.49	3.8	251	262	22.6	20.97
26	0	4	6136820	19	19	0	1	0	0	0	0	0	0	4	4	1.53	1	1.1	1	2.4	2.8	213	281	22.7	24.80
27	1	3	6092614	45	47	0	1	0	0	0	1	0	0	4.7	6	1.57	2	1.2	2	2.78	3.6	226	283	22.7	34.04
28	0	3	6017321	21	21	0	0	0	0	0	0	0	0	7.2	5	2.33	2	1.8	2	3.26	2.6	233	147	22.93975069	25.01
29	0	4	6122924	39	39	0	0	0	0	0	0	0	0	4.6	6	1.81	1	0.9	1	2.54	4.8	166	201	23.1	26.12
30	1	4	6111715	47	50	0	0	0	0	0	0	0	0	4.3	5	1.6	1	1	2	2.34	3.6	191	365	23.3	32.41
31	0	4	6111812	45	46	0	1	0	0	0	0	0	0	4.3	6	2.24	2	0.9	1	1.67	3.8	253	187	23.6	19.84
32	1	3	6058762	30	29	0	1	0	0	0	0	0	0	4.8	5	1.27	1	1	4	3.36	3.2	210	376	23.7	28.51
33	1	2	6004910	46	47	1	1	0	0	0	0	1	0	5.9	5	1.21	2	1.4	1	4.12	2.8	322	246	24.0	23.84
34	1	1	6094065	38	38	1	0	0	0	0	0	0	0	3.2	6	1.2	1	0.8	7	1.62	3.6	353	535	24.2	35.80
35	1	3	6159043	18	17	1	0	0	0	0	0	0	0	5.1	4	01.06	1	2	1	2.7	2.8	307	227	24.4	23.51
36	1	4	6058072	23	24	0	0	0	0	0	0	0	0	4.5	6	1.26	1	0.7	2	2.68	4.6	272	412	24.4	31.14
37	1	3	6059169	45	47	0	1	0	0	1	0	0	0	6.5	5	1.35	1	2.4	2	4.53	3.6	241	239	24.6	34.22
38	1	2	6082538	32	31		0	0	0	0	0	0	1	3.8	4	1.11	2	1.3	2	2.28	1.6	340	325	24.8	28.70
39	1	3	6160401	25	23	1	0	0	0	0	0	1	0	4.2	4	1.5	1	1.2	1	2.42	2.8	267	244	24.8	24.71
40	0	3	6070746	38	40	1	0	0	0	0	0	0	0	5.1	4	1	1	1.4	1	3.54	2.8	168	112	24.8	25.00
41	1	1	6057480	18	19	0	1	0	0	0	0	0	0	2.6	6	0.83	1	1.6	4	1.47	4.2	366	449	24.9	28.63
42	0	3	6057213	47	50	0	0	0	0	0	0	0	0	4.1	7	1.26	2	1.8	1	2.51	4.8	293	265	24.9	27.06
43	0	4	6059992	36	36	0	0	0	0	0	0	0	0	4.9	6	1.76	1	0.9	3	2.72	4.4	251	277	25.6	22.32
44	0	3	6059877	43	45	0	1	0	0	0	0	0	0	3.4	6	1.36	1	1.8	2	1.7	4.6	204	236	25.8	40.15
45	0	3	6034735	30	30	1	1	0	0	0	0	0	0	5.1	4	1.92	2	0.9	1	2.81	1.8	237	238	25.8	23.80
46	0	3	6002666	38	39	0	0	0	0	0	0	0	0	3.9	5	1.57	2	1	2	2.2	2.6	207	198	25.9	24.62
47	1	4	6065498	28	29	0	0	0	0	0	0	0	0	5.5	6	1.47	2	1.2	1	3.64	3.8	246	396	26.0	21.80
48	1	2	6094117	36	36	0	1	0	0	0	0	0	0	4.4	8	0.81	2	4.9	2	2.45	5.6	296	331	26.1	25.77
49	0	3	6050122	46	46	1	0	0	0	0	0	1	0	5.1	6	01.01	2	2.5	1	3.44	3.8	120	194	26.1	23.71
50	0	3	6064134	47	45	0	0	0	0	0	0	0	0	5.5	6	1.96	2	0.9	2	3.51	3.6	262	297	26.2	30.49
51	1	3	6102939	32	32	0	1	0	0	1	0	0	0	4.5	4	0.87	1	1.9	2	2.2	2.6	238	399	26.4	28.71
52	0	2	6074353	39	40	1	0	0	0	0	0	0	0	4.1	5	2.27	1	1.1	5	1.63	3	338	311	26.4	40.40
53	1	1	6160818	45	45	0	0	0	0	0	0	0	0	5.6	4	0.93	1	2.7	2	3.83	2.6	333	384	26.8	31.92
54	1	1	6031464	43	43	1	1	0	0	0	0	0	0	3.4	5	0.95	1	3.8	4	1.6	3.2	383	292	27.4	21.91
55	1	4	6054465	45	47	0	1	0	0	0	0	0	0	4.6	5	1.22	1	1.9	2	2.99	3.6	196	387	27.4	34.11
56	0	4	6019268	32	32	1	0	0	0	0	0	0	0	4.1	6	1.27	2	2.2	1	02.02	3.8	245	138	27.5	20.82
57	1	3	6035974	24	26	0	0	0	0	0	0	0	0	5.5	5	0.95	1	2.2	2	3.95	3.6	274	242	27.6	27.55
58	0	3	6168625	29	28	1	1	0	0	0	0	0	0	5.1	6	1.58	1	0.8	2	2.4	4.6	255	174	27.7	18.22
59	1	2	6160906	39	38	0	0	0	0	0	0	0	0	4.8	4	01.08	1	0.3	1	2.74	2.8	408	314	27.8	29.38
61	1	4	6082769	45	47	1	1	0	0	1	0	0	0	4.2	5	0.9	1	2.3	5	2.87	3	164	255	27.8	28.39
60	1	3	6001825	34	32	0	0	0	0	0	0	0	0	4.4	5	01.04	2	1.1	0	2.84	3	366	277	27.8	28.37
62	1	2	6024330	47	47	1	0	0	0	0	0	0	0	5	8	01.02	2	3.3	3	2.99	5.4	264	248	27.9	25.93
63	0	3	6128131	40	40	0	0	0	0	0	0	0	0	4.7	5	1.24	2	1.4	1	3.13	2.8	311	196	28.0	21.01
64	1	2	6098432	27	27	1	1	0	0	0	0	0	0	4	4	0.86	1	2.3	3	2.61	2.4	461	292	28.0	37.98
65	0	3	6138688	47	47	0	0	0	0	0	0	1	0	4.9	5	1.35	2	1.7	1	2.94	2.8	176	269	28.1	24.46
66	0	3	6132772	22	20	0	0	0	0	0	0	0	0	4	5	1.64	1	0.6	1	02.06	3.8	202	276	28.2	22.72
67	1	4	6170055	43	45	0	0	0	0	0	1	0	0	4.6	6	0.94	1	0.8	5	2.19	4	235	342	29.0	30.45
68	0	1	6000701	48	47	0	0	0	0	1	0	0	0	5.1	6	1.38	2	1.2	1	3.64	3.8	225	220	29.0	25.25
69	1	3	6132693	21	22	1	1	0	0	0	0	1	0	3.2	4	1.12	1	1	1	1.73	2.8	338	388	29.1	22.99
70	1	3	6060545	42	44	0	1	0	0	0	0	0	0	2.9	7	0.94	1	0.9	1	1.71	5.8	235	316	29.2	22.02
71	1	3	6002435	24	23	0	0	0	0	0	0	0	0	5.1	5	1.43	1	0.6	1	3.51	3.8	422	341	29.3	28.65
72	1	1	6123871	49	48	0	1	0	0	0	0	0	0	4.8	7	1.27	1	0.6	6	3.37	4.8	215	392	29.4	34.60
73	1	3	6059974	38	37	0	1	0	0	0	0	0	0	4.6	5	1.18	1	0.9	1	3.29	3.8	348	255	29.5	20.98
74	1	3	6158080	33	34	0	1	0	0	0	0	0	0	4.6	7	01.06	1	2.8	4	03.01	5.2	351	351	29.6	23.66
75	0	3	6102577	36	38	?	0	0	0	0	0	0	0	6.4	4	2.16	2	2	1	2.84	1.8	248	191	29.6	24.46
76	1	4	6061863	39	38	0	0	0	0	1	0	0	0	5.5	7	01.01	2	2.8	2	2.41	4.6	371	358	29.7	21.15
77	1	3	6027531	25	25	0	0	0	0	0	0	0	0	3.3	5	0.93	1	0.7	1	2.29	3.8	365	340	30.0	25.22
78	0	4	6064134	45	45	0	0	0	0	1	0	0	0	3.4	6	1.42	2	1.1	2	1.83	3.6	274	297	30.1	30.49
79	1	3	6097901	22	21	1	0	0	0	0	0	0	0	5.8	4	3.8	1	1.6	1	1.45	2.8	382	267	30.3	22.53
80	1	4	6108687	45	43	0	1	0	0	1	0	1	0	5.2	6	1.32	1	1.6	2	3.47	4.6	293	416	30.3	27.78
81	0	4	6055534	20	22	1	0	0	0	0	0	0	0	5.6	5	1.49	1	1.7	1	2.62	3.8	295	309	30.4	20.31
82	1	4	6045111	45	44	0	1	0	0	0	0	1	0	4.8	7	1.42	2	0.9	2	03.07	4.6	272	260	30.5	25.71
83	1	4	6041692	31	32	0	0	0	0	0	0	0	0	4.3	5	1.64	2	1.3	1	2.51	2.8	238	223	30.6	20.23
84	0	4	6056737	34	35	0	0	0	0	0	0	0	0	3.4	4	01.01	2	2	1	1.94	1.8	232	137	30.7	24.46
85	1	3	6064514	23	23	0	1	0	0	0	0	0	0	3.9	6	0.86	2	1.1	1	2.47	3.8	470	318	30.7	23.55
86	0	2	6067238	44	44	0	1	0	0	1	0	0	0	4.8	7	1.26	1	1.3	1	3.43	5.8	308	247	30.7	24.97
87	0	2	6093792	46	47	0	0	0	0	1	0	0	0	4.3	4	1.18	1	1.2	2	2.76	2.6	205	196	30.9	23.80
88	0	2	6163596	26	26	1	1	0	0	0	0	0	0	4.9	4	1.13	1	1.6	1	3.35	2.8	301	194	31.2	27.68
89	0	3	6034416	42	42	0	1	0	0	0	0	0	0	5.8	5	1.63	1	0.8	1	3.7	3.8	222	187	32.3	19.38
90	0	4	6070782	30	31	0	0	0	0	1	0	0	0	4.4	6	1.69	2	0.6	3	2.41	3.4	216	168	32.3	21.51
91	0	3	6066053	28	28	0	1	0	0	1	0	1	0	6.8	5	02.02	2	0.9	1	4.19	2.8	278	268	33.0	20.76
92	0	4	6057365	37	36	0	1	0	0	1	1	1	0	6.4	5	1.12	1	2.7	3	2.81	3.4	363	288	33.8	25.07
93	1	2	6111955	38	40	0	0	0	0	1	0	1	0	5.6	5	1.84	2	0.8	1	3.77	2.8	299	434	33.9	23.70
94	1	2	6155533	41	40	0	1	0	0	1	0	0	0	2.4	5	0.81	1	1	1	1.36	3.8	246	283	34.0	20.60
95	0	2	6008129	47	45	0	0	0	0	0	0	0	0	5	6	1.31	2	1	1	3.53	3.8	308	208	34.0	22.77
96	1	2	6142025	32	34	0	1	0	0	0	0	0	0	4.6	6	01.08	1	1.4	3	3.25	4.4	477	316	36.3	25.15
97	0	3	6062853	42	40	0	0	0	0	0	0	0	0	5.9	8	1.41	1	1.9	3	4.2	6.4	250	333	36.3	26.30
98	1	4	6042026	21	19	0	0	0	0	0	0	1	0	4.2	4	0.88	1	3	1	2.49	2.8	372	313	36.3	25.59
99	0	4	6056515	49	48	0	0	0	0	1	0	0	0	4.7	5	1.51	2	1.1	1	2.87	2.8	405	205	39.96	19.60
100	0	1	6133081	47	46	0	1	0	0	1	1	1	0	4.2	6	2.11	1	1.2	2	02.08	4.6	353	333	40.6	32.01
101	0	4	6013909	27	26	1	0	0	0	1	0	1	0	4.7	5	1.2	2	0.9	1	2.67	2.8	278	242	42.0	20.62
102	0	3	6056515	46	48	0	0	0	0	1	0	1	0	5.6	5	2.14	2	1.6	1	3.14	2.8	248	205	43.9	19.60
103	0	2	6025117	32	31	0	1	0	0	0	0	0	0	4.5	4	1.29	1	1	1	3	2.8	300	277	48.3	25.65
104	0	3	6152837	31	30	0	0	0	0	1	0	1	0	2.7	6	0.69	1	1.1	5	1.47	4	288	271	59.2	27.97
* 1: elementary (8 grades),2: trade school, 3: high school diploma 4: university
** Major Adverse Cardiovascular Event
*** Diabetes Mellitus
**** Body Mass Index
